# Supplementary material for: In vivo PIWI slicing in mouse testes deviates from rules established in vitro
Source: PubMed Central journal article supplement (PMC9945443; doi:10.1261/rna.079349.122), 2023-03

Expression of dysregulated genes in spermatogenic populations  
10xPerf vs. WT

A

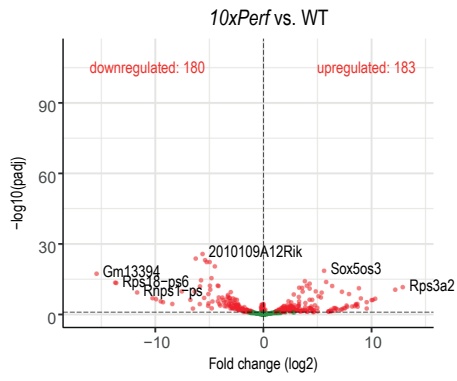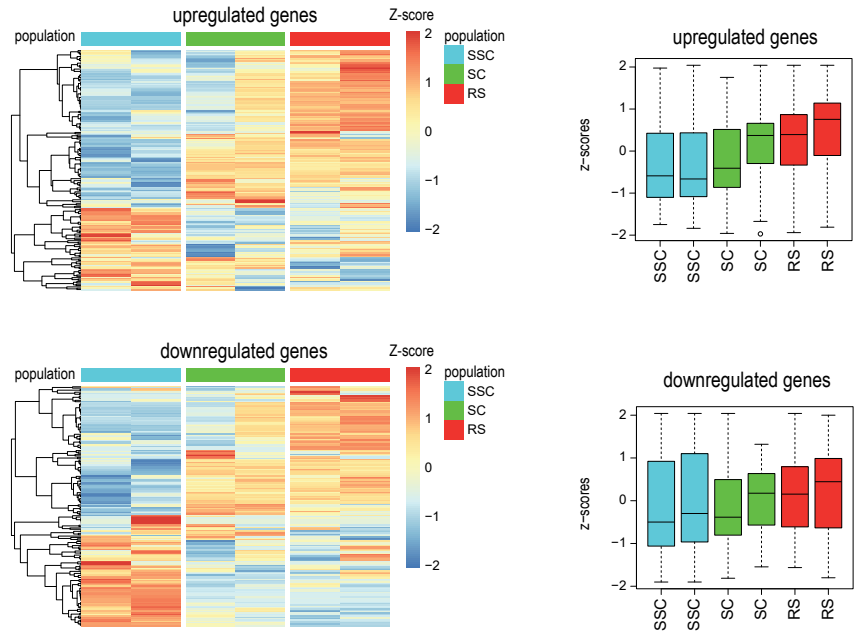

B

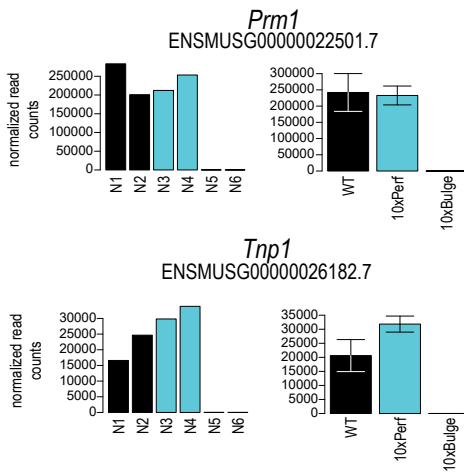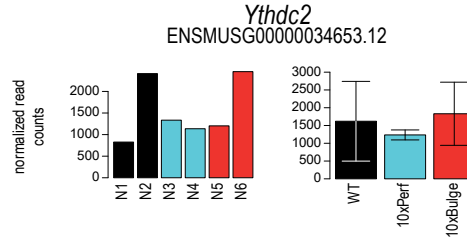

C

Expression of dysregulated genes in spermatogenic populations  
10xBulge vs. WT

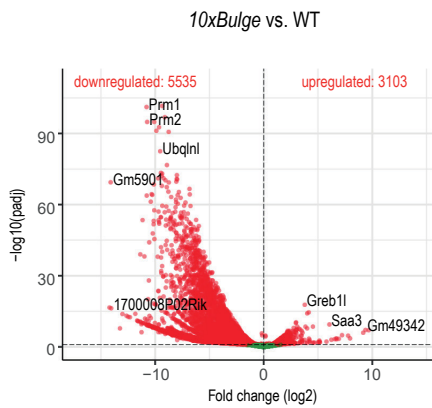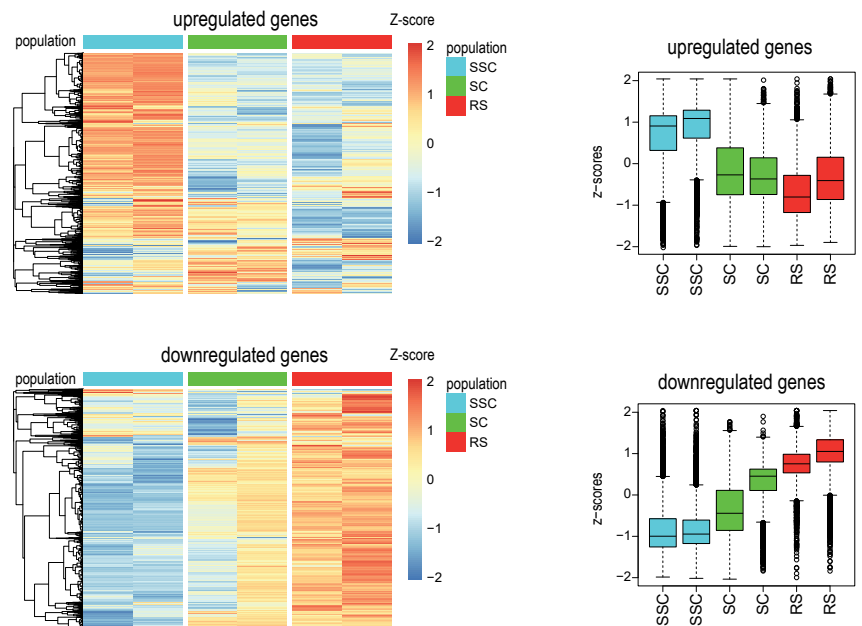

Supplement: supp_079349.122_Supplemental_Figure_1.pdf [file supp_079349.122_Supplemental_Figure_1.pdf]
