# Supplementary material for: In vivo PIWI slicing in mouse testes deviates from rules established in vitro
Source: RNA. 2023 Mar;29(3):308–16. doi: 10.1261/rna.079349.122 (PMC9945443; doi:10.1261/rna.079349.122)
Supplement: Supplemental Material [file supp_079349.122_Supplemental_Figure_2.pdf]

GAGACAGGGTTTAACTCTTTAGCCTGAGCTGTCTAGAACTCACTGGGTAGACGGGGCTGGCAACAAAGTGGCTCTCAAGTCTCTGGGATTAAGAGCGTTTGTACACACCGCTCCCCAACTCATGA  
GAGGTTCTCTTTATCTTAATCTTGCCCAACCAAGCAACTATTCTTCATGCTATGCGTCCACATCCACGGTGGGTCTCCGATAAACTCTGAGCAGCTTCGTAAGTATCTATGTAAGCATTTTCATTT  
TGGGAGCATCATTAATCTTTTGGGTGGCGAGGTAAGAGCTAAATCTTCTTGGGTAATTCAGTTTTCAGTTCTGAGATTAAGAGATATATACTAAAGAGTTTGTGGCTATTTAAATCAAA  
CCAGTCGGTCCCTCACTGATTAATCTTGTCTACTACGACCAACCCCAAGTATTCGGGGGAAACCCCTGTGTTTCAGCGCGTTCGAGTTTGTGACTCTAGCGCTGGGCAAGAGACCGGCTTATTA  
AAGAAGGAGCGAAGCACTTAGATGATCGATGGGTGAACCGAAATAATATTCTTCCAAATTAATGACACTTTTGAGCAACAAAGCTCTGGGCTCTGAGACACAGACCCCTCCAAAGACCGCAAT  
CCCCAGCGACGACCCGACAGCGAGCGTCCCGCGTTCTGGGTTGGCGGCGCGCGCTCGTGACGTCATCAGACGCGCGCGCGCGCGCGCGCGCGAGCTTCTCTGGTTAGAGTGTGCGCGG  
CTTCTGCTTCCACCGTTCGCTGAGGCGGCTTTCCCGCGCTCCCGCGCGCGCTGCTCTCGAGGCTTCAGTCCGCGCGCTCTCAGCGCTCTCTGTCTCTGACTCTGCTGCGCGACGGCC  
TGCGCGCTCCACGCGGAGCGAGCTTCTCTCAGGCGATGTCAGCGCGAGCGAGCTCTCCGCGCTFCGCGCGCTCTAGCGGAGGCGACCGCGCGGGCGGTGAGGTGGCATGCTGCGCGCGCGGTG  
CGGCTGCGCGCGCGCGCGAGCTCTGTCTGTCTGTGAGGCGGTGCGCGCGGCGCAAGCGGCTCAAGACAACTTGCTATCGACGAGGAGTGAAAGTCCCGCTCAAACTCTCTGGAGCGCTTCGCTACG  
GTGACCGAAGCAAAATGGAATTCCTCTTTTGACCGAGTACGGAAAGAGCCTTTATTCCACGACTAAGTCAATCTCTTGTTTAGTTCTTAAAGTAGAAGAGGAGCAAAATAGATCACTCACT  
TGAAGAAGAAATGGATCAGAAACAGCTCATGAATGATGACCTGTAATTTGACTCAATAACAAAACATCGTGTAGAGCGCTAATTCAGAGATTCTCTGCACCAATAAAGAACGACTCACTGAACCTC  
CTGCTAAACAGAAAGAGGAATGTGTTTGCAGTTGAAGCTGAAACCGAGAAATGACGACAGCAAGACAGCGGGGCACTCAACATGGCATTCCTCAAGTTCTCTGAAAGGGGAGAGTCTGAAATTTGACT  
CATTCAGCGCATCTTACAGTTTGTGAGAAACAGAAAGAAATTTGTAATAATTAAGGAAATAAAGATGTTTGTATGATGAGAAACTGGGTCTGGAAGAACACACACAGATTCCTCAAGTCTCTGCT  
TAGATGATTGCTTTAAAAATGGCATCCCCCGGAATTTTGTACTCAAAAGACGACTGACAGCGATTGCTGTGGCTGAAAGAGTTGCTCGCAGAGAGAAGAAAGAAATTTGGTCAAACAATTTGGT  
ATCATGCTCGGATTAAGAAAGCGGGTTTGCAGAAAGCTCTGCAATATTTTGCATATTTGGCATATTTGGGTTATGCTTCGTACATTGATGGCAGGTTGATGACCATTTGCAATGTGACCTGTTTATTTGGGATG  
AAGTGCATAAAGAGGCTCATGATGATTTTGTACTAAGTAAAGAGATTGTGGAACCAAGCAACCAATTTGAAACTAATTTCTTCAGGCTCGCTTGAGTGTGACCTCTCTATAGATATT  
TTGGAAGTTTTCGACGTATATATACAGGAAGACCAATTTCAGTATAAAGAAATTTGCTTGAAGATATTTTTAAAGACATACAGGATTTACCAACAAAGAAATTTAAAGTACATAAAGAAAGAAC  
GAGAGGAGAAACCAACAGCAACCTTCAGAGTGGTACTGAGCTCAAGAGAAATACCTTCAAGCTGAGATCTCAGAGACAGAGGCTGTTTGCATGTGCTCGAAGATGACTTATTTGGATGATGGAG  
GTGATGCTGCTTTCTCAGTCAGCTGACAGAAAGAAATGTGAATTTGCTTGAACCATGTTAATCAAGAGATGGATGCTCGCTTTCTGCATATAGGTGCTAAAGATGTTGATGCTTTTGTCTCAGGCT  
TTCATCTTATTTTAACTGAAATTTGATGTTGATATAGGCATAGTGAGACAGCTGACAGCAAGCTCTGATGTTGCTCGACGAGCGGGCTTTACGAGCCAGTACGAGCAATTAATGATGTAGAGGACA  
ATGCTCCAGATTAAGCATCAAAATGGCTGTGATGGCTTATGATTTGAGTGGGTGATGAGCACTTTGGCAACAGCTGAAATTTGGATGCTCTTGAAGATCTTACAGATGCTCTTGAATTTGGAAATCTAGATGAAAGT

>10xPerf

GAGACAGGGTTTAACTCTTGAGCTCGAGCTGTCTAGAAGTCTAGTGGTAGAGCGGGTGGCAAAACGTGGCTCTCAAGTCTGGGATTAAGAGCGTTTGTACACACCGCTCCCCAACTCATGA  
GAGGTTGCTCTTTATCTTAATCTTGCCCAACAGAGCACTAATCTCTGCTATGCGTCCACATCCACGTGGGCTCTCTCCCTAAATCTGAGACATCTCAGTAACTATCATCTGATAGCAATTTCTATT  
TGGGAGCATCATTAATCTTTGGGTGGCAGGATAAGAGATTTAATCTTTATTCCGGTAAATTCAGTTTCAAGTGTCTCAGAAAGAAATATACTAAAGAGTTATGCGTTATTTAAATCAA  
CCAGTCGCTCCCTCAGCTGTACTTACTTTGCTCTCTAGACACCAAGCCCGAATTCGCGGGGAAACCCCTTTGTTCCAGCGCGTCTGAGATTTGTGACTCTAGCCGCTGGGCAGAGAAGCCCGCTTATA  
AAGAAAGAGCGAAGCACTTAGATGATCGAGTGGGTAAACCAATAATATGTCTCCATTAATGACACTTTTGGAGAACCAAAAGCTCGGGGCTGGAGGACACAGACCCCTCCAAAGGACCGATT  
CCCGAGCGCAGACCCGACAGCCAGCGCTCCCGGCTTTGGGTGGCGCGCGCCGCGCTCGTGAGCGTCATACGCGCGCGCCGCCCGCCGCGAGTCTCTGGGTTAGAGTGGTGCGCGCG  
TCTTGCTCTCCAGCGCTGCCGTGAGCGGCGTTTCCCGCGCTGCGCCCGGCTGCTTCCTCAGAGCTTCAGTCCGCGCGCTCTCAACCGGCTCTCTGTTCTGCTGACGTCTGCTGCTGCGAGCGAGCG  
TGCGCGCTCCACGCGAGCGACTTCTCTCAGGCGCATGTCCAGCGCGAGCGTCTCGCCGCTCGCCCGCTCTAGCGAGGCGCAGCGCGCGCGGTGAGAGTGGCAGTGGCAGTGGCGCGCGGTG  
GCGGTGGCGCGCGCGCCAGCTCTGCTGTGCTGGAGGCGGTGGCCGGGCCAAGGCTCTAAAGACATTCGTATCGACGAGGAGGTGAAGATCGCCGCTCAACATCGCTCTGGAGCGCTTCGCTAG  
GTGACGAGAGAAGATGGAATTCCTCTTCTCTGACAGTACGGAAGAGCGCTTTATTCACCGACTAAGTCAATCTCTTGTTTGTAGTTCTTAAAGTAGAAGGAAGGACAAATGACATCTAACTG  
TAGAAGAAAGAAATGGATCAGAAACAGCTCATGAATGATGACCTGAATTTGACTATACCAACAAACATGCTGTAGAGCGAATTTACAGAGATTTCTCTACCAACAAAGAACGATCACTGAACTC  
TACCTTAAACAGAAAGAGGAATGTGTTTGCATGTGAAGCTGAAACCGAGAAATGAGCAAGACAGCGGGCGCATCAACAATGGCATTCCTCAAGTTCCTGTGAAAGGGGAGAGTCTGAATTTGACT  
CATTCAGGCGAGTCTTTACCAAGTTTGTGAAACCAAGAAAGAAATGTTAAATAAATTAAGAAAGAAATGTTTATGATGAGAGAAATCGGGTCTGGAAGAACACACAGATTCCTCAGTTCCTGT  
TAGATGATTTCTTTAAATTTGGCATTCCTCCGCAATTTTGTACTCAACCGACAGCATGACGAGGATTCGTGTGGTGAAGAGTTGTCGCAGAGAGAAGAAAGATTTGGTCAAAACATTTGGTT  
ATCAGATCCGATTAAGAAAGCGGTTTGCCTAAAGCAGTCTGCATCAATTTGTCATATGAGATTTGGGATATGCTTGCATCAATGATGGCAGGTTAGAGCAATTTGCAATGTGACCATTTGTTATTTGGATGT  
AAGTGTCTAAAGGCGATCATTCAGTGAATTTTGTCTTAAAGTAAAGATTTGTGCAAAAGCAACCAATTTGAAACTAATTTCTTGAGTCTGCTCTGGAATGTGAACCTCTTATATAGAATATT  
TTGGAAGTTGTCACGTGATATATATACAGGGAAGACCATTTGAAGTAAAGAAATGTTTCTGGAAGATATTTTAAAGACTACAGATATACCAACAAAGAAATGTTAAAGTACAAAAGGAAAGCAAC  
GAGAGGAGAAACACAGACCCCTCAGAGGTGGTATCTGAGTCAAGAGAATGCTTCAAGCGCTGAGTCTCAGAGCGAGAGCTGTGCTGATGTGTCTGAGAGAGTATGATCTATTGGATGATGGAG  
GTGATGCTGTCTCAGTCAGCTGCAGACAAAGAGTGAATTTGCTTGAACCATGTTTAACTCAAGGAGATGGATGCTCGCTTCTGCATATGGCTGCATAAAGATGTGTGATGTTTCTCGCTCAGGCTCT  
TTCACTCTTATTTTTAACTGAAATGTATTGTTGATATAGGCATAGTGAGACAGCTGCAACAGCTCTGATGGTTGCTGACGAGACGGGGCTTTACGAGCCAGTACAGCAATTAATAGTATGGGAGCCA  
ATGTCCACAGTAAAGCATCAATGGCTGGATGGCTTTAGATTTGGCTAAGCACTTTGGACAGACTGAAATTTGGATCTCTTGAAGATCTTACAGTCTCTTATGGAAATTTGGAATCTAGATGAAGTT  
CTTTGGTTTACAGAAATTTGGAATGACCTCAGTCAGAGAAGCAGAGAGCTGTGAAAGCTTACCATATAGTTTGTATGATGAAGAGTAGACTTGGAAITTTGATCATGCATCTCCTATATAATATCTGCC  
ATAGCTGTGATGCTGGGCAATATTTTCTTACCTGGATATGATGAATTTGTGGTTTGGAGGATCGTATCTCTTTGATGACAACGGTGTGCTGCACATCAATAGATATCAAGTCTTTATGCT  
TTCATTCAAATATGCAGACATCTGATCAAAAGAGAGTTATAAAAATCCCTCAGCGAGTGTCCGAGAAAATATCTCTTCCACCAATTTGCTGAGACGAGCATCTGTCAGATGATGTTGTGTTTGTGTTA  
TTGATCTCGTGAAGTGAAGAGAAATCCTTTGATGCACTGAATTTTGTACAATGTTAAAAATGGTATGGATTTCCAAGCTAGTGCAATACAGCGCAAAGGCAGAGCGGGACGCTGAGACTGGAA  
TTGTTTTCGCTGTGTTTGTAGACTCTGCAATTTCAAGAACTCTGGAAATTTCAAGCAGCGAAGCTTTGAGAATGCCATTCGAGGAACATTTGTTTACATCAACAGCTGTAGGCCCAATTAACGTACCA  
TTCGCACTCTCTTATGAAGAGCCCTGACACGCGCTCAGGTTTAAATTTGAGAAATGCTGTGCAGATGCTTAAGACATATAGATGCAATGGATGAGGAAGTCTGACGAGATCTGGGTATGATCTTTGG  
CTGATTTCGAGTGAAGACGCGATCTTGGGAAATGTGCTGTGTCAGTGGTTTGAAGTGTCTGCAGCCATPCTCTACAATTTGCTTGACGCTGCGTTACCGTGACCTCTTTTGCTCTGCTACCCAGG  
CCTTTCCAAACGGGCGACTGATCTGTTTAGAAAGACCGCTTCACTGACGGGACTTCACTGAGCACATGTCACATTTGAGACGATTTCAAGCATGCGCAAGGACGAGTGTGGTGGGAGCGAGCT  
TTTGTGAAAGAAATTTCTTTTCAACAGTCACTATTGGAATCATTATAGGCATGAGAAACAGTGTGCTTGTGACGTTTAGAGCATCAGGTTTGTGTAGACGACAGGTTGGTGGTGACATTCGAGATGTTA  
ATACAACTCCGAGATCGGGCTGTGTTAAAGCTGCAATTTGATAGGAGCATGTATCTCAATTTAGTCCAGCTGGACAGAGAGATATGAATATTGTCAGGCGCAAAGGAAAGAAATGACGTTTCTATC  
CCACTTCAGTTCTCAGTCAACCTCAATACAAAGAAATCTCCCGCCAAATGGTCAAGCTCGAGCATTCAGGACTTGGCCACAGATTTGGCTTATTATGATGAATAGGAGAGAGCCGATCGAATTTGCA  
ATATCAGATGTTGTTTACAGAGTGACACCTGTACTCTGCTGGTCTGTCTGGACAGCAGACAGTGGCAAGTAAAGCCTCTTACAGAAAGCTTCATCTTTAGCGGAGTGGTATTCCTCAATGACAGCAAT  
ACAGTGAAGTGAAGACAGAACTACTGCCAATTTTGGCTGCTTTGAAGCTTGATGAATGGCTTAACTCTCAAATCAGAGCAGAGGCTGCCAGTTTATTGCTACAGCTCAGCAGACAGTGGCATAGTTTGT  
TTTACCGCGAATGAGAGCGCATCTAAACCTTTGCTCAGTGCATGAAGCTACATACAGCAATTAAGCTTTTAAAGCATGAAGACAGCTCGAGGTTTACAGAGCATCTGGAATTTGCC  
AGCGGCAAGACCATGTCTTCAAGAGAACTCTTTGGCTCTATCTTGGAGATCAACATATAGTAGGAAGATCAGCTGACATGAGTTTGGCGATGGATCTGAACTCTGGAGAAGAGATGACTATGATGA  
AATCTTCATCTCCAGCCTTACATCCCACTCAGAACTCAGAGTACAGGAATTTTACATCTCAAGCGGAGCCAGTACGCGGCTCGATCAATCATCTGTAACTCCACAGACAGCAGCATTAACCA  
GTCCTTGTGCGACGCCCCCTCTCTCCATCTCAGGGAAGGGATCAAAATCTCTTTACCAAGACCAAACTGCGCTATTCTGTACTTCAATGAAGAGTAGCAATCTGAGAAACCTTGAATTTCTCAAC  
AGAAGGGTATCTGGTTTCAAGCCCTAGTAATGAGCGGAAGCTAAATGACGGCTTTTGGAGAGGACAGATGTTTATCTGGTATTTTCTGTTTCAAGGATCTGGACATTTCTCAGGAAATTTCTAGATGT  
CTTTGACATAGGAGAGGACAGAGGACGAGCTGGGGTCACTGAGTGGTGAAGTATTTAAAGTGGATGGATAGCAAGAAAGAGCTTCCTCTTCAAGTTGACACAAATTTACTCAATCTCTGGA  
ACGCAACACAGAAAGTACAGATACAGCAGAGATGGGACGAGCTGAAAGCTCAGGTTGGGGAACAGTTCCTCAAGTTTGGGAAACGCTTCCATTGGGAGAAACAACTCTGATTTGACATTCAGAAC  
TCTGGCTATGGAAGAGCGTTTATGCTTAAAGTATCTGAGCACGCTGTGTCATGTCAGCGCAGCTGGCGTAAAGAACTATCTGAGCACCTGTGTTCTCATGTCTAGCGAAGAGCGGACGAAATCTGTA  
GCACCTGTGTTTCATGTCACAGCATGCGCCTTCAAAGCTATCTGAGCACGCTGTGTTTCATGTACCAACAGTTCGGGACAGAGCTCTGAGCACCTGTGTTCTATGTCACTGAAAGCGGAAAGAAAGCT  
ATCTGAGCACCTGTGTTCTATGTCAAGCGCTTTGCTCTTAAAGTATCTGAGCACCTGTGTTTCATGTCATCCGCGACAGCAAGAACATCTTGTGAGCACCTGTGTTCTATGTCAAGTGGCGGAAAGCT  
TAAAGTATCTGAGCACCTGTGTTCTATGTCAAGCTGGATGCGCATTAAGCTATCTGAGCACCTGTGTTCTATGTCAAGTGTGATGATCAGAAATGACATGCTGATTTTGAACAACTGAGTGAAGTGTGTTGT  
CCATGAGTGGATTGAGGCATAGAGATTCTCTCAGAAATCATCTCTCATATAGAGGAAAGATAATTTAAATTTTCTTAGTGGTTTAAAGAAATATTATATATAGTTTGTTAATTTCTGTTTCA  
GTAGAACAAATAGCAATTTTGGTATACACAGCACTAATTTAATTAATTTGAATGTAAACATTTCTTAAATATTGATTAAGTCACTGTTATGCGAAAGCTCTTTCTCTTTGCTCTTCAGAC  
AGGGTTTCTTTCTTTTGAAGCTCAAGTGCAGGAAGTACGCTGTGTAAGACAGCGTCACTCAACATCAGACATATGCTGCTGTGTTTCTGCTCTGAAATCAGTAATGAAGCTTGCACAGT

>10xBulge

Inserted sequence
